# Supplementary material for: Circadian modulation of light-evoked avoidance/attraction behavior in Drosophila
Source: PubMed Central journal article supplement (PMC6091921; doi:10.1371/journal.pone.0201927), 2018-08-14

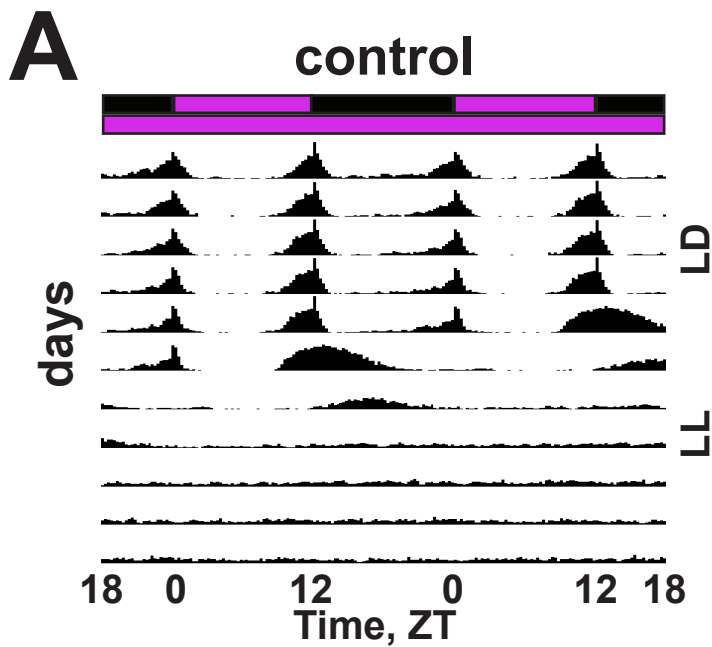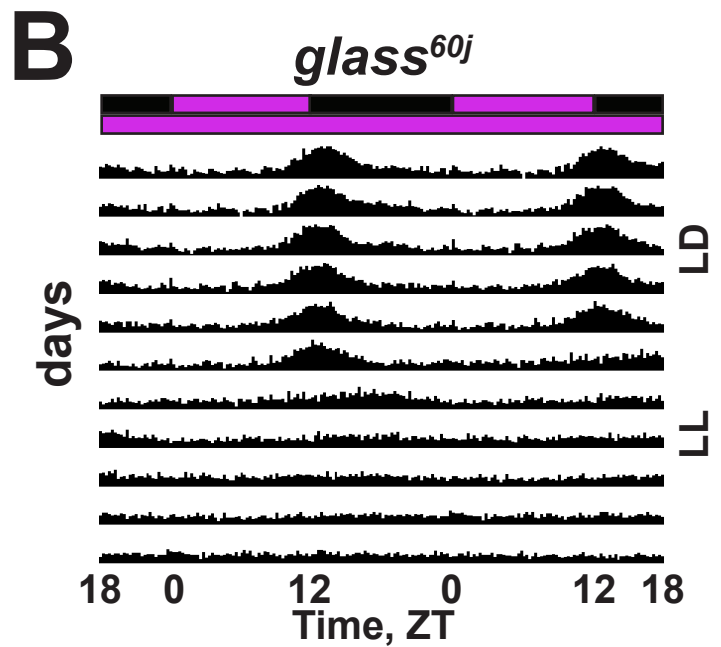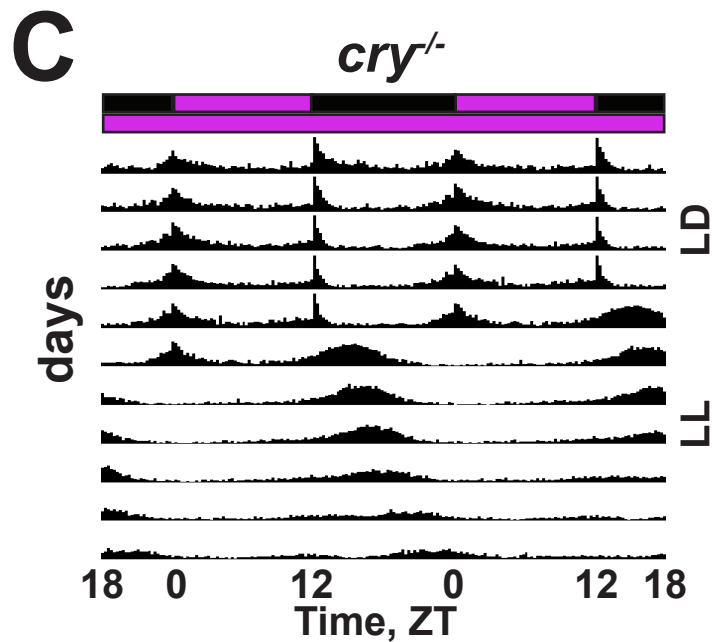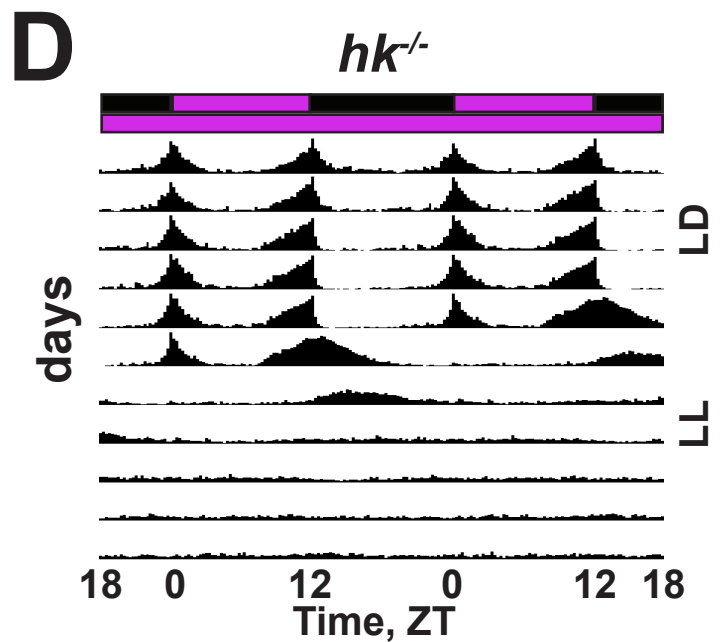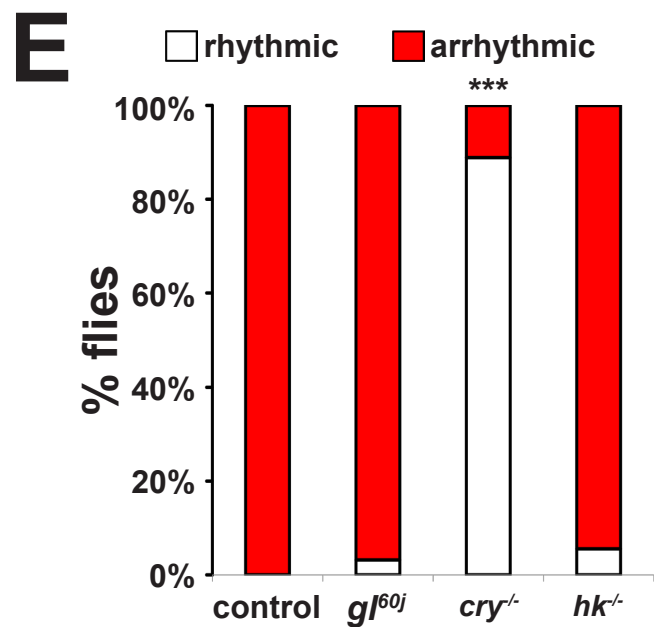

Supplement: pone.0201927.s002.pdf [file pone.0201927.s002.pdf]
