# Supplementary material for: Circadian modulation of light-evoked avoidance/attraction behavior in Drosophila
Source: PubMed Central journal article supplement (PMC6091921; doi:10.1371/journal.pone.0201927), 2018-08-14

**A***cry*<sup>-/-</sup> vs. LNV ablated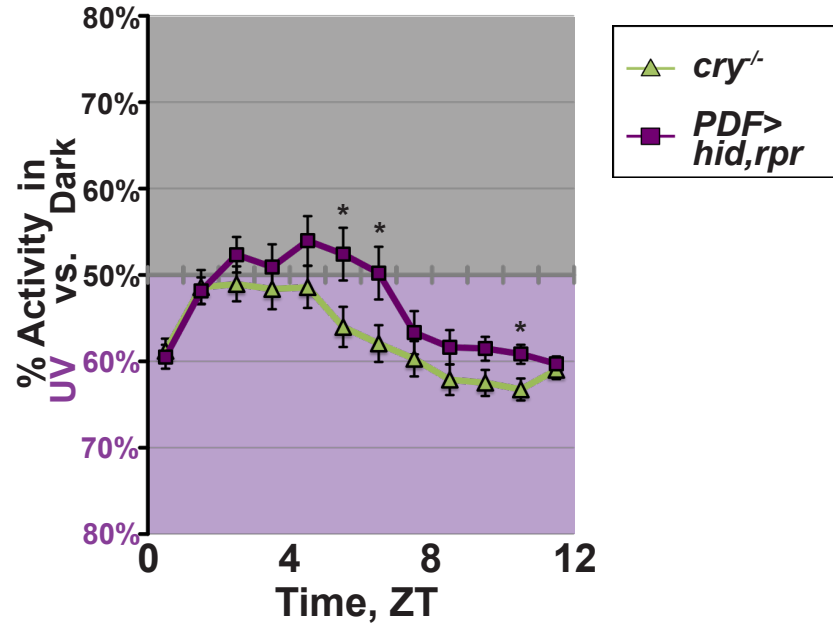**B***hk*<sup>-/-</sup> vs. LNV ablated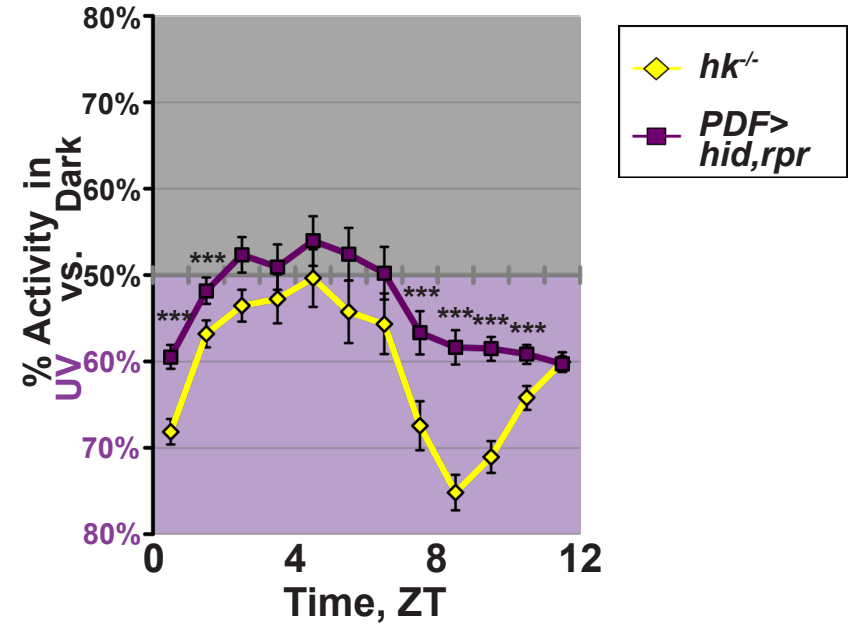

Supplement: pone.0201927.s004.pdf [file pone.0201927.s004.pdf]
